# Supplementary material for: 2023 temperatures reflect steady global warming and internal sea surface temperature variability
Source: Springer Nature journal article supplement (doi:10.1038/s43247-024-01637-8), 2024-08-27
Supplement: 43247_2024_1637_MOESM2_ESM.pdf [file 43247_2024_1637_MOESM2_ESM.pdf]

1 2023 temperatures reflect steady global warming and internal  
2 sea surface temperature variability

3 Bjørn H. Samset, Marianne T. Lund, Jan S. Fuglestedt, Laura J. Wilcox

4 Supplementary materials

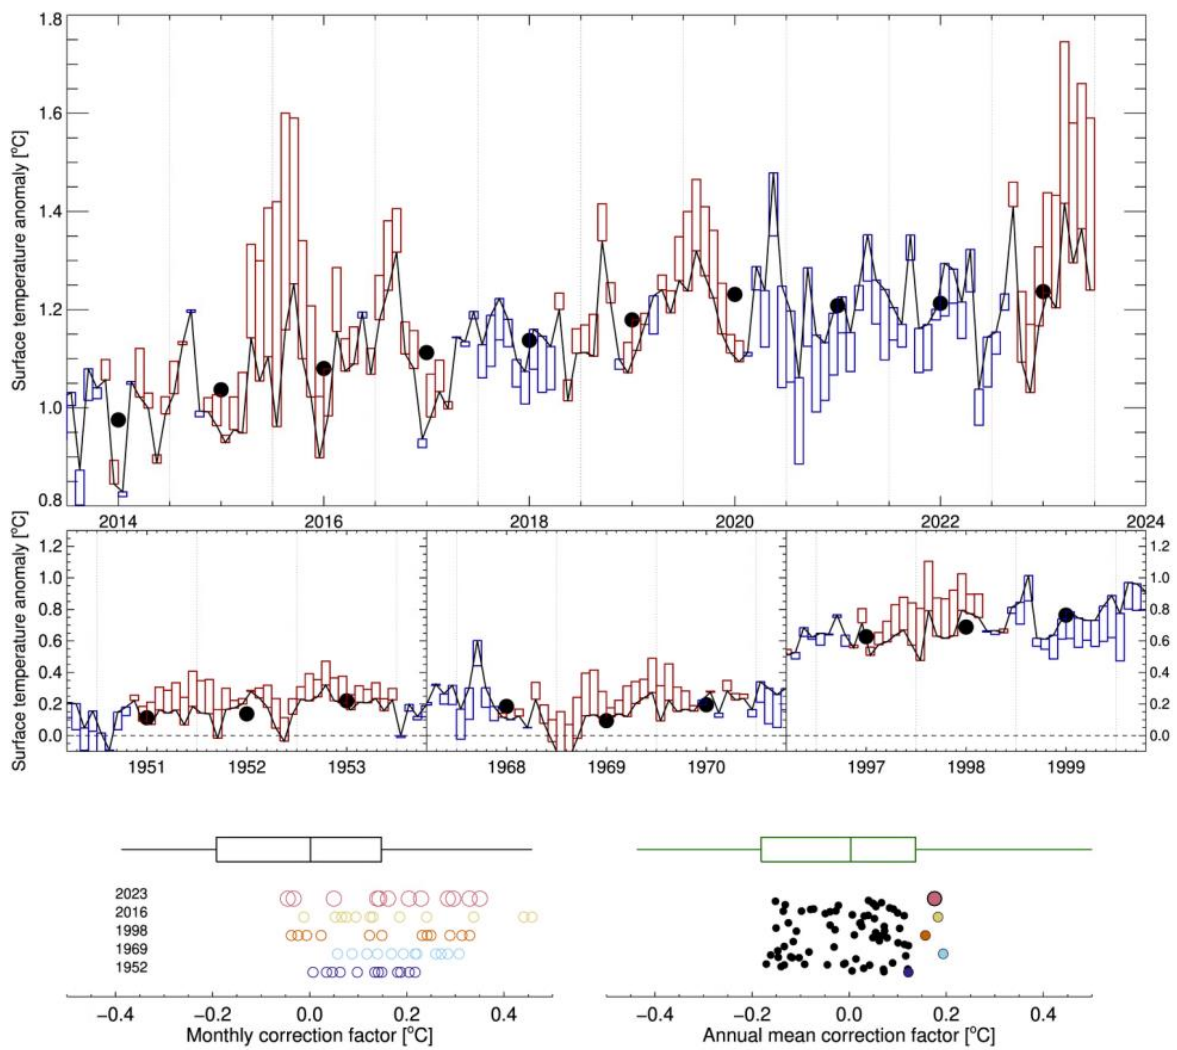

5

6 Supplementary Figure 1: Global, annual mean surface temperature anomalies from the  
7 GISTEMP data series, raw (red) and SST influence filtered via a model derived transfer  
8 function (black). The upper and lower insets show, respectively, the full data series since  
9 1858, and the latest 10 years. Anomalies are taken relative to 1880-1899.

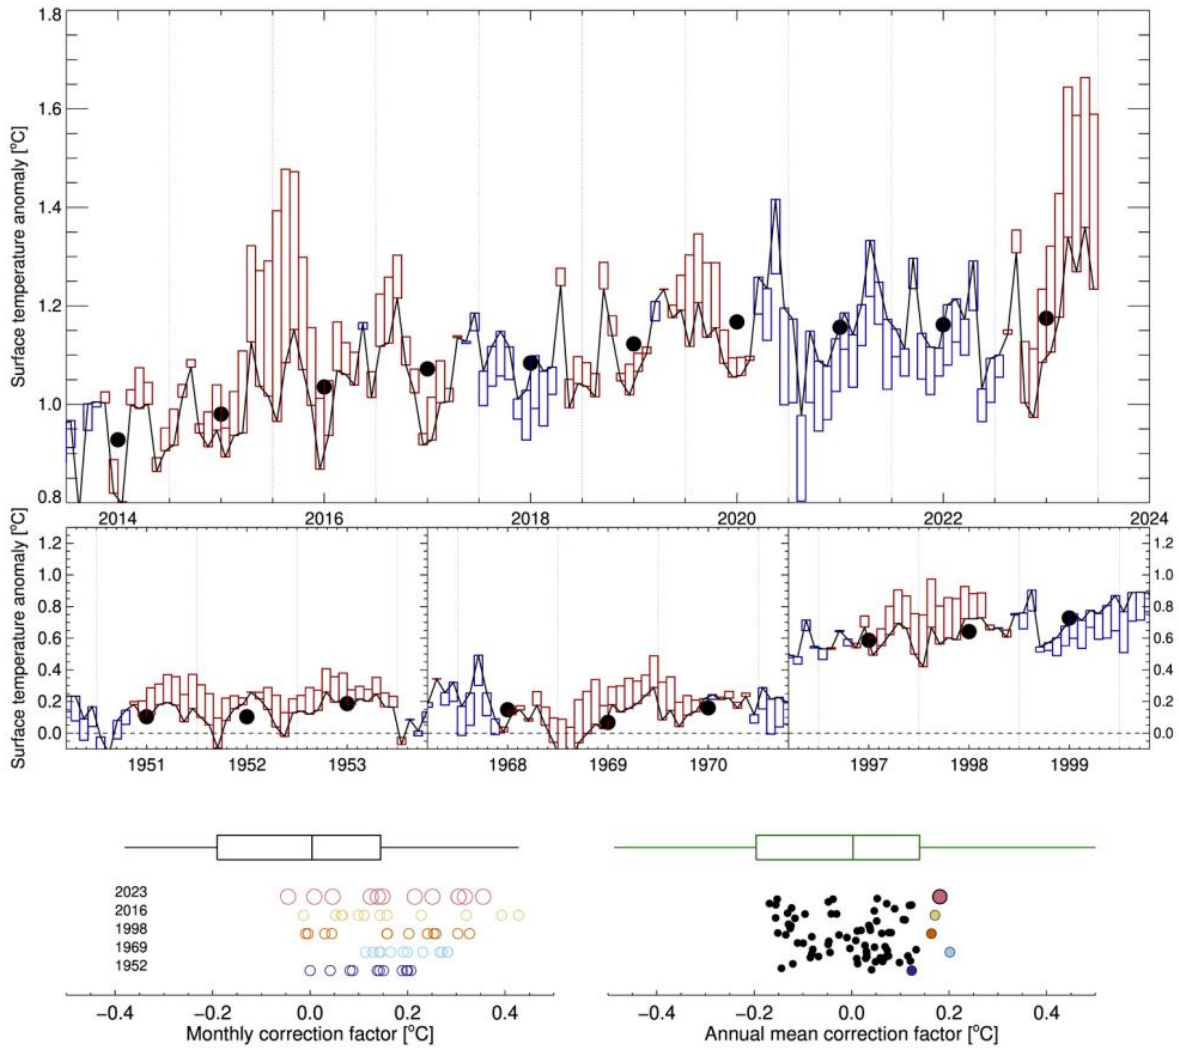

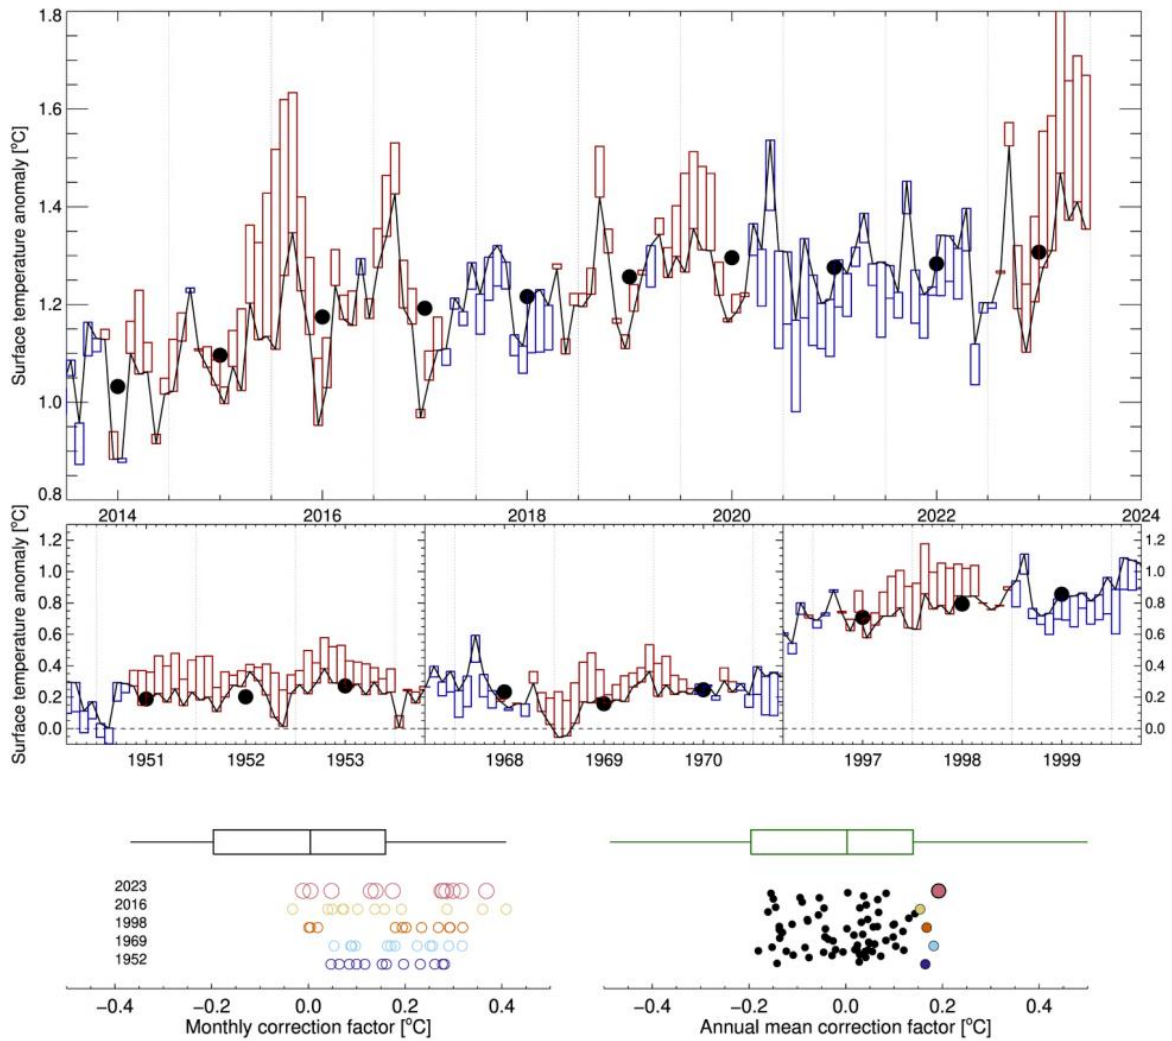

15

16 Supplementary Figure 3: Global, annual mean surface temperature anomalies from the  
 17 Berkeley Earth data series, raw (red) and SST influence filtered via a model derived transfer  
 18 function (black). The upper and lower insets show, respectively, the full data series since  
 19 1858, and the latest 10 years. Anomalies are taken relative to 1850-1900. The month that  
 20 extends beyond the end of the y-axis in the upper panel (September 2023) has a raw GSTA  
 21 value of 1.84 °C, and an SST based correction of 0.39 °C.
